# Supplementary material for: Gastrodin ameliorates learning and memory impairment in rats with vascular dementia by promoting autophagy flux via inhibition of the Ca2+/CaMKII signal pathway
Source: Aging (Albany NY). 2021 Mar 10;13(7):9542–65. doi: 10.18632/aging.202667 (PMC8064221; doi:10.18632/aging.202667)
Supplement: Supplementary Figures [file aging-13-202667-s001.pdf]

SUPPLEMENTARY FIGURES

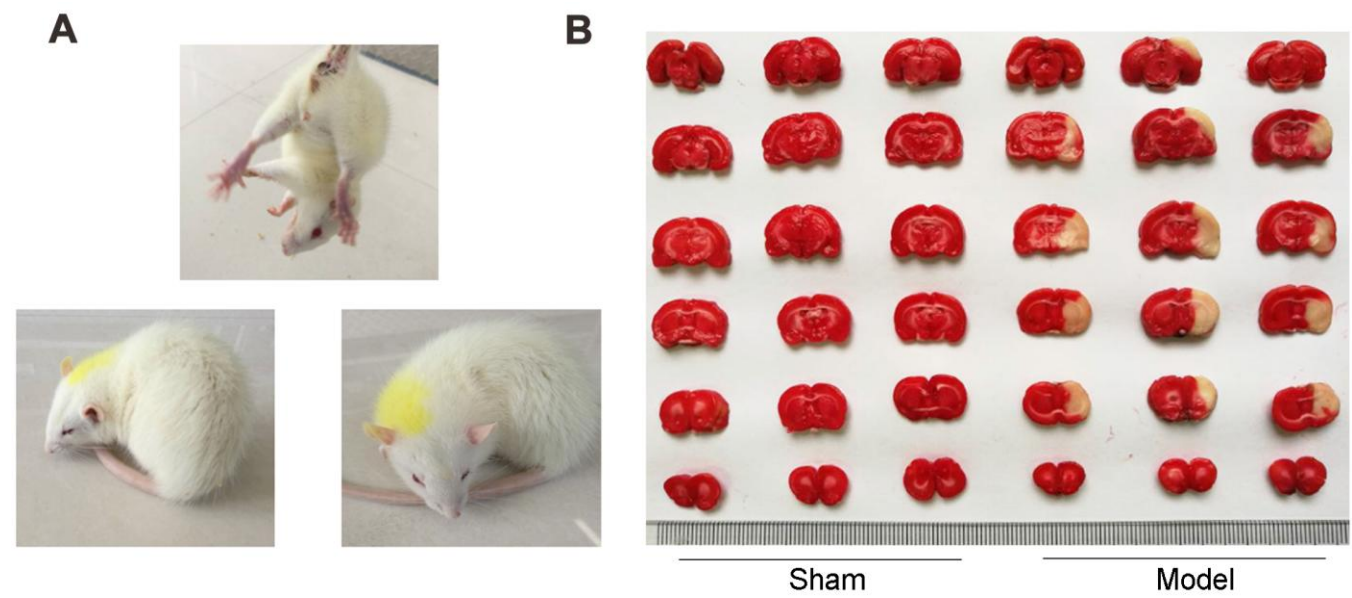

**Supplementary Figure 1. Establishment of a rat model of vascular dementia.** (A) Representative images of “Longa scoring”. (B) Tetrazolium Chloride (TTC) staining in rat brain tissue.

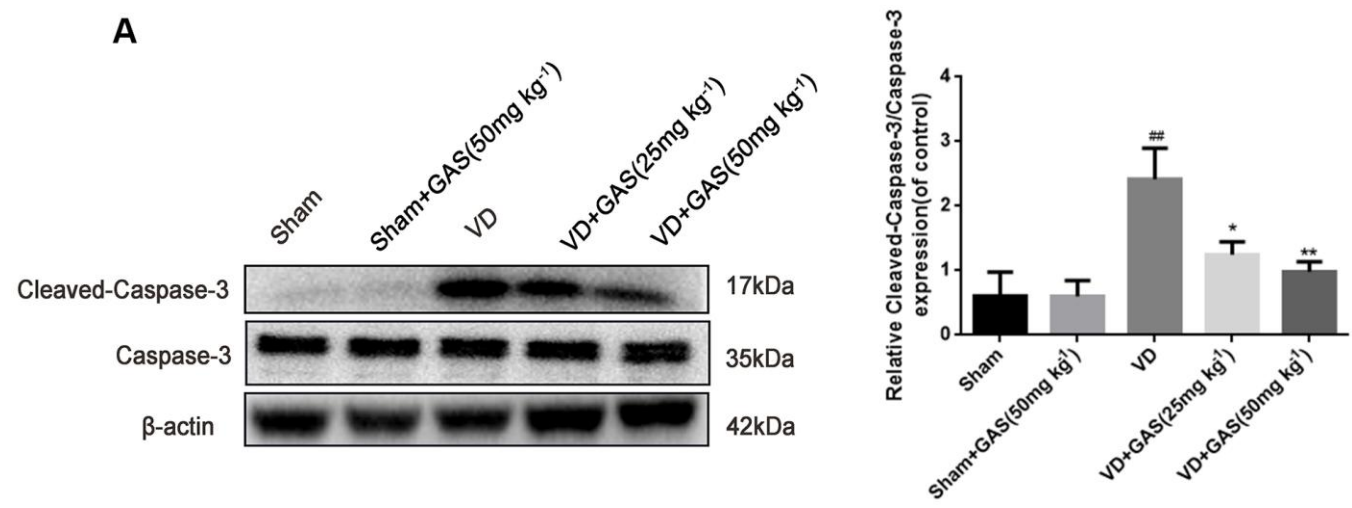

**Supplementary Figure 2. Effects of GAS on the protein expression of Caspase-3 in the hippocampus tissues of rats.** (A) The protein extract of hippocampal tissue was analyzed by Western blotting with Cleaved-Caspase-3 and Caspase-3 (left). Protein levels were quantified and normalized to  $\beta$ -actin (right). Data represent the mean  $\pm$  SEM. <sup>##</sup> $P < 0.01$  versus sham, <sup>\*</sup> $P < 0.05$ , <sup>\*\*</sup> $P < 0.01$  versus model.

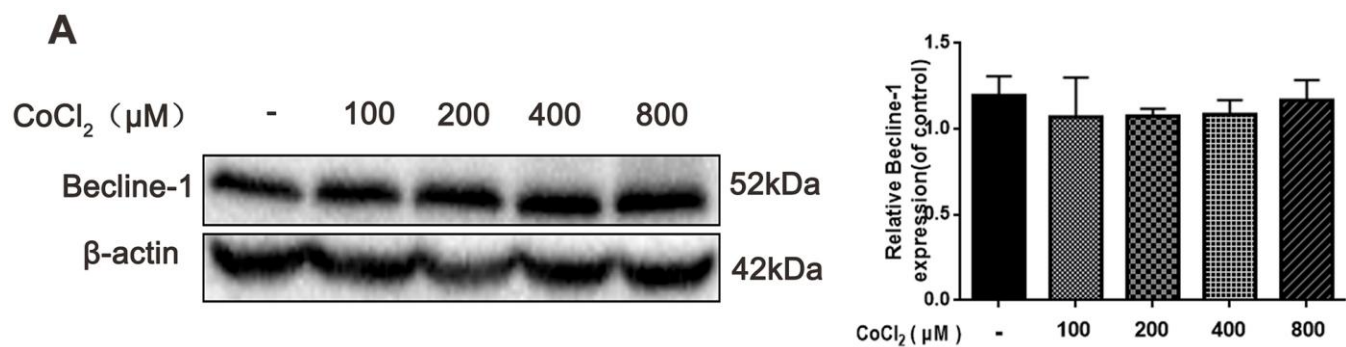

**Supplementary Figure 3. Effects of CoCl<sub>2</sub> on the expression of autophagy-related proteins in HT22 cells.** (A) Immunoblots showed levels of Becline-1 in HT22 cells treated with various concentrations of CoCl<sub>2</sub> (0, 100, 200, 400 and 800 μM) for 24 h. β-actin was used as loading control. Data represent the mean ± SEM. <sup>##</sup>*P* < 0.01 versus control.
